# Supplementary material for: Quality Evaluation of Fresh Pasta Fortified with Sourdough Containing Wheat Germ and Wholemeal Semolina
Source: MDPI journal article supplement (doi:10.3390/foods12142641), 2023-07-08
Supplement: s1 [file s1]

**Table S1.** Physicochemical composition of raw materials used for pasta production

| Samples             | pH          | TTA<br>(mL NaOH 0.1N) | Moisture<br>(g/100g) | Ashes<br>(g/100g d.b.) | Proteins<br>(g/100g d.b.) | Gluten<br>(g/100g d.b.) |
|---------------------|-------------|-----------------------|----------------------|------------------------|---------------------------|-------------------------|
| Wheat Germ          | 6,75(±0.02) | 10,71(±0.11)          | 13,09(±0.03)         | 5,66(±0.02)            | 29,71(±0.76)              | -                       |
| Wholemeal Semolina1 | 6,95(±0.03) | 4,56(±0.02)           | 12,30(±0.02)         | 1,64(±0.04)            | 13,44(±0.24)              | 9,90(±0.18)             |
| Wholemeal semolina2 | 6,54(±0.01) | 4,31(±0.03)           | 14,87(±0.13)         | 1,51(±0.06)            | 13,25(±0.41)              | 9,58(±0.45)             |
| Wholemeal Semolina3 | 6,54(±0.03) | 4,88(±0.12)           | 12,50(±0.12)         | 1,54(±0.06)            | 13,26(±0.19)              | 9,20(±0.70)             |
| Semolina1           | 6,71(±0.18) | 2,41(±0.02)           | 13,73(±0.03)         | 0,90(±0.01)            | 11,47(±0.55)              | 7,92(±0.32)             |
| Semolina2           | 6,52(±0.02) | 2,28(±0.11)           | 13,77(±0.02)         | 0,83(±0.01)            | 11,32(±0.09)              | 8,52(±0.46)             |
| Semolina3           | 6,55(±0.06) | 2,44(±0.03)           | 13,31(±0.03)         | 0,77(±0.01)            | 11,16(±0.08)              | 8,02(±0.51)             |

Mean of, at least, three replicates ± standard deviation.

**Table S2.** Viable counts of LAB, yeast, mould and aerobic bacteria (cfu/g) in pasta samples stored at 5°C under modified atmosphere.

| Samples        | 0 gg                |                     |                       | 35 gg             |                   |                     | 75 gg             |                   |                       | 95 gg             |                   |                       |
|----------------|---------------------|---------------------|-----------------------|-------------------|-------------------|---------------------|-------------------|-------------------|-----------------------|-------------------|-------------------|-----------------------|
|                | LAB                 | Y&M                 | TAB                   | LAB               | Y&M               | TAB                 | LAB               | Y&M               | TAB                   | LAB               | Y&M               | TAB                   |
| Raw wheat germ | 1.6x10 <sup>6</sup> | 1.0x10 <sup>5</sup> | 1.2x10 <sup>7</sup>   | n.d.              | n.d.              | n.d.                | n.d.              | n.d.              | n.d.                  | n.d.              | n.d.              | n.d.                  |
| Sourdough      | 1.0x10 <sup>9</sup> | 1.7x10 <sup>6</sup> | n.d.                  | n.d.              | n.d.              | n.d.                | n.d.              | n.d.              | n.d.                  | n.d.              | n.d.              | n.d.                  |
| CP             | < 10 <sup>2</sup>   | < 10 <sup>2</sup>   | < 10 <sup>2</sup>     | < 10 <sup>2</sup> | < 10 <sup>2</sup> | 7 x 10 <sup>2</sup> | < 10 <sup>2</sup> | < 10 <sup>2</sup> | < 10 <sup>2</sup>     | < 10 <sup>2</sup> | < 10 <sup>2</sup> | 6 x 10 <sup>2</sup>   |
| RGP            | < 10 <sup>2</sup>   | < 10 <sup>2</sup>   | 2.5 x 10 <sup>2</sup> | < 10 <sup>2</sup> | < 10 <sup>2</sup> | 60                  | < 10 <sup>2</sup> | < 10 <sup>2</sup> | 60                    | <10 <sup>2</sup>  | <10 <sup>2</sup>  | 1 x 10 <sup>2</sup>   |
| SP             | < 10 <sup>2</sup>   | < 10 <sup>2</sup>   | 1.5 x 10 <sup>2</sup> | < 10 <sup>2</sup> | < 10 <sup>2</sup> | 80                  | < 10 <sup>2</sup> | < 10 <sup>2</sup> | 1.2 x 10 <sup>2</sup> | <10 <sup>2</sup>  | <10 <sup>2</sup>  | 1.5 x 10 <sup>2</sup> |

LAB = lactic acid bacteria; Y&M = yeast and mould; TAB = total aerobic bacteria; n.d. = not done

**Table S3.** Yeasts and LAB species found in sourdough*Kazachstania servazzii**Torulaspora delbrueckii**Pichia fermentas**Clavispora lusitaniae**Fructilactobacillus sanfranciscensis**Lactobacillus plantarum***Table S4.** Fatty acid profile of raw materials used for pasta production

|                    | <b>Palmitic acid</b> | <b>Stearic acid</b> | <b>Oleic acid</b>    | <b><i>cis</i>-Vaccenic acid</b> | <b>Linoleic acid</b> | <b><math>\alpha</math>-Linolenic acid</b> |
|--------------------|----------------------|---------------------|----------------------|---------------------------------|----------------------|-------------------------------------------|
|                    | C16:0                | C18:0               | C18:1 n9             | C18:1 n7                        | C18:2 n6             | C18:3 n3                                  |
|                    | (%)*                 | (%)                 | (%)                  | (%)                             | (%)                  | (%)                                       |
| Semolina           | 16.80 ( $\pm 0.41$ ) | 1.38 ( $\pm 0.02$ ) | 16.76 ( $\pm 0.42$ ) | 1.09 ( $\pm 0.04$ )             | 57.74 ( $\pm 0.34$ ) | 3.96 ( $\pm 0.08$ )                       |
| Wholemeal Semolina | 16.28 ( $\pm 0.09$ ) | 1.25 ( $\pm 0.03$ ) | 17.83 ( $\pm 0.39$ ) | 1.17 ( $\pm 0.06$ )             | 56.98 ( $\pm 0.37$ ) | 4.14 ( $\pm 0.15$ )                       |
| Wheat Germ         | 17.50 ( $\pm 0.04$ ) | 0.67 ( $\pm 0.00$ ) | 17.89 ( $\pm 0.07$ ) | 1.57 ( $\pm 0.01$ )             | 53.28 ( $\pm 0.14$ ) | 6.29 ( $\pm 0.04$ )                       |

Main fatty acids (Area % &gt; 1 % of total FAME) are reported

Mean of, at least, three replicates  $\pm$  standard error.

\* each fatty acid was expressed as percentage on the total fatty acids identified with GC analysis

**Table S5.** Complete fatty acid profile of Control Pasta (CP) samples during storage at 5°C under modified atmosphere. Each fatty acid was expressed as percentage of the sum of total fatty acids. Statistical analysis results are reported.

|                 | CP           |        |              |        |              |        |              |        |              |        | Statistical analysis             |                 |
|-----------------|--------------|--------|--------------|--------|--------------|--------|--------------|--------|--------------|--------|----------------------------------|-----------------|
|                 | T0           |        | T15          |        | T35          |        | T55          |        | T75          |        | ANOVA + Tukey's test             |                 |
|                 | Mean         | St.dev | Significant differences          | <i>p</i> -value |
| <b>SFA (%)</b>  | <b>20.64</b> | 0.18   | <b>20.54</b> | 0.24   | <b>20.30</b> | 0.19   | <b>20.28</b> | 0.11   | <b>20.15</b> | 0.08   | T55-T0; T75-T0; T55-T15; T75-T15 | 1.90E-03        |
| C14:0           | <b>0.08</b>  | 0.00   | <b>0.08</b>  | 0.00   | <b>0.07</b>  | 0.00   | <b>0.07</b>  | 0.00   | <b>0.07</b>  | 0.00   |                                  |                 |
| C15:0           | <b>0.11</b>  | 0.00   | <b>0.11</b>  | 0.01   | <b>0.10</b>  | 0.00   | <b>0.10</b>  | 0.00   | <b>0.10</b>  | 0.00   |                                  |                 |
| C16:0           | <b>18.39</b> | 0.18   | <b>18.28</b> | 0.25   | <b>17.97</b> | 0.31   | <b>17.93</b> | 0.09   | <b>17.75</b> | 0.07   |                                  |                 |
| C17:0           | <b>0.12</b>  | 0.01   | <b>0.12</b>  | 0.02   | <b>0.11</b>  | 0.00   | <b>0.12</b>  | 0.01   | <b>0.12</b>  | 0.01   |                                  |                 |
| C18:0           | <b>1.46</b>  | 0.05   | <b>1.48</b>  | 0.04   | <b>1.49</b>  | 0.05   | <b>1.49</b>  | 0.04   | <b>1.50</b>  | 0.03   |                                  |                 |
| C20:0           | <b>0.11</b>  | 0.00   | <b>0.11</b>  | 0.01   | <b>0.12</b>  | 0.00   | <b>0.12</b>  | 0.00   | <b>0.12</b>  | 0.01   |                                  |                 |
| C21:0           | <b>0.03</b>  | 0.00   | <b>0.03</b>  | 0.00   | <b>0.02</b>  | 0.01   | <b>0.02</b>  | 0.01   | <b>0.02</b>  | 0.01   |                                  |                 |
| C22:0           | <b>0.18</b>  | 0.01   | <b>0.19</b>  | 0.01   | <b>0.21</b>  | 0.02   | <b>0.22</b>  | 0.01   | <b>0.23</b>  | 0.00   |                                  |                 |
| C23:0           | <b>0.04</b>  | 0.00   | <b>0.04</b>  | 0.00   | <b>0.05</b>  | 0.00   | <b>0.05</b>  | 0.01   | <b>0.06</b>  | 0.01   |                                  |                 |
| C24:0           | <b>0.12</b>  | 0.01   | <b>0.12</b>  | 0.01   | <b>0.15</b>  | 0.03   | <b>0.16</b>  | 0.01   | <b>0.17</b>  | 0.01   | T55-T0; T75-T0; T55-T15; T75-T15 | 3.49E-03        |
| <b>MUFA (%)</b> | <b>15.75</b> | 0.12   | <b>15.78</b> | 0.16   | <b>15.89</b> | 0.31   | <b>15.86</b> | 0.27   | <b>16.04</b> | 0.17   | T75-T0; T75-T15                  | 1.80E-03        |
| C16:1 n9        | <b>0.09</b>  | 0.00   | <b>0.08</b>  | 0.00   | <b>0.09</b>  | 0.01   | <b>0.08</b>  | 0.00   | <b>0.08</b>  | 0.00   |                                  |                 |
| C16:1 n7        | <b>0.14</b>  | 0.00   | <b>0.14</b>  | 0.01   | <b>0.13</b>  | 0.01   | <b>0.13</b>  | 0.01   | <b>0.13</b>  | 0.00   |                                  |                 |
| C17:1 n8        | <b>0.06</b>  | 0.00   | <b>0.05</b>  | 0.00   | <b>0.05</b>  | 0.00   | <b>0.06</b>  | 0.01   | <b>0.06</b>  | 0.01   |                                  |                 |
| C18:1 n9        | <b>13.91</b> | 0.14   | <b>13.95</b> | 0.19   | <b>14.05</b> | 0.28   | <b>14.02</b> | 0.29   | <b>14.15</b> | 0.19   |                                  |                 |
| C18:1 n7        | <b>1.02</b>  | 0.01   | <b>1.02</b>  | 0.01   | <b>1.02</b>  | 0.03   | <b>1.01</b>  | 0.02   | <b>1.03</b>  | 0.02   |                                  |                 |
| C18:1 n5        | <b>0.02</b>  | 0.02   | <b>0.01</b>  | 0.02   | <b>0.01</b>  | 0.01   | <b>0.00</b>  | 0.00   | <b>0.00</b>  | 0.00   |                                  |                 |
| C20:1 n11       | <b>0.03</b>  | 0.00   | <b>0.03</b>  | 0.00   | <b>0.03</b>  | 0.01   | <b>0.03</b>  | 0.01   | <b>0.03</b>  | 0.00   |                                  |                 |
| C20:1 n9        | <b>0.41</b>  | 0.00   | <b>0.41</b>  | 0.01   | <b>0.43</b>  | 0.01   | <b>0.43</b>  | 0.00   | <b>0.46</b>  | 0.02   |                                  |                 |
| C22:1 n9        | <b>0.04</b>  | 0.01   | <b>0.04</b>  | 0.00   | <b>0.05</b>  | 0.00   | <b>0.05</b>  | 0.01   | <b>0.05</b>  | 0.01   |                                  |                 |
| C24:1 n9        | <b>0.04</b>  | 0.00   | <b>0.04</b>  | 0.00   | <b>0.05</b>  | 0.01   | <b>0.05</b>  | 0.01   | <b>0.05</b>  | 0.01   |                                  |                 |
| <b>PUFA (%)</b> | <b>62.49</b> | 0.17   | <b>62.56</b> | 0.25   | <b>62.61</b> | 0.13   | <b>62.63</b> | 0.31   | <b>62.56</b> | 0.24   |                                  |                 |

|                     |              |      |              |      |              |      |              |      |              |      |                                           |
|---------------------|--------------|------|--------------|------|--------------|------|--------------|------|--------------|------|-------------------------------------------|
| <b>n6</b>           | <b>58.79</b> | 0.21 | <b>58.85</b> | 0.26 | <b>58.89</b> | 0.13 | <b>58.99</b> | 0.36 | <b>58.89</b> | 0.24 |                                           |
| C18:2 n6            | <b>58.70</b> | 0.20 | <b>58.76</b> | 0.23 | <b>58.80</b> | 0.11 | <b>58.90</b> | 0.34 | <b>58.80</b> | 0.22 |                                           |
| C20:2 n6            | <b>0.09</b>  | 0.03 | <b>0.09</b>  | 0.03 | <b>0.09</b>  | 0.02 | <b>0.09</b>  | 0.02 | <b>0.09</b>  | 0.02 |                                           |
| <b>n3</b>           | <b>3.69</b>  | 0.10 | <b>3.71</b>  | 0.07 | <b>3.70</b>  | 0.08 | <b>3.63</b>  | 0.05 | <b>3.66</b>  | 0.05 |                                           |
| C16:4 n3            | <b>0.06</b>  | 0.06 | <b>0.07</b>  | 0.04 | <b>0.08</b>  | 0.06 | <b>0.02</b>  | 0.01 | <b>0.02</b>  | 0.01 |                                           |
| C18:3 n3            | <b>3.62</b>  | 0.06 | <b>3.62</b>  | 0.06 | <b>3.62</b>  | 0.05 | <b>3.61</b>  | 0.05 | <b>3.65</b>  | 0.05 |                                           |
| C20:3 n3            | <b>0.01</b>  | 0.01 | <b>0.01</b>  | 0.01 | <b>0.00</b>  | 0.01 | <b>0.00</b>  | 0.00 | <b>0.00</b>  | 0.00 |                                           |
| <b>other n</b>      |              |      |              |      |              |      |              |      |              |      |                                           |
| C18:4 n1            | <b>0.01</b>  | 0.01 | <b>0.01</b>  | 0.02 | <b>0.01</b>  | 0.02 | <b>0.01</b>  | 0.01 | <b>0.01</b>  | 0.01 |                                           |
| <b>other FA (%)</b> |              |      |              |      |              |      |              |      |              |      |                                           |
| C18:2 n6 trans      | <b>0.04</b>  | 0.00 | <b>0.04</b>  | 0.01 | <b>0.03</b>  | 0.01 | <b>0.03</b>  | 0.01 | <b>0.03</b>  | 0.01 |                                           |
| C19:1 n10 trans     | <b>0.05</b>  | 0.00 | <b>0.05</b>  | 0.00 | <b>0.05</b>  | 0.00 | <b>0.04</b>  | 0.02 | <b>0.04</b>  | 0.01 |                                           |
| Unknown 1           | <b>0.11</b>  | 0.01 | <b>0.11</b>  | 0.01 | <b>0.15</b>  | 0.03 | <b>0.16</b>  | 0.01 | <b>0.18</b>  | 0.01 | T55-T0; T75-T0; T55-T15; T75-T15 2.65E-03 |
| Unknown 2           | <b>0.66</b>  | 0.04 | <b>0.66</b>  | 0.05 | <b>0.69</b>  | 0.02 | <b>0.71</b>  | 0.04 | <b>0.71</b>  | 0.02 |                                           |
| Unknown 3           | <b>0.26</b>  | 0.01 | <b>0.26</b>  | 0.02 | <b>0.27</b>  | 0.00 | <b>0.28</b>  | 0.02 | <b>0.28</b>  | 0.02 |                                           |
| PUFA/SFA            | <b>3.03</b>  | 0.03 | <b>3.05</b>  | 0.05 | <b>3.08</b>  | 0.02 | <b>3.09</b>  | 0.03 | <b>3.11</b>  | 0.02 |                                           |
| MUFA/SFA            | <b>0.76</b>  | 0.01 | <b>0.77</b>  | 0.01 | <b>0.78</b>  | 0.02 | <b>0.78</b>  | 0.01 | <b>0.80</b>  | 0.01 |                                           |
| n3/n6               | <b>0.06</b>  | 0.00 |                                           |

SFA = Saturated Fatty Acid

MUFA = Monounsaturated Fatty Acid

PUFA = Polyunsaturated Fatty Acid

**Table S6.** Complete fatty acid profile of Raw Germ Pasta (RGP) samples during storage at 5°C under modified atmosphere. Each fatty acid was expressed as percentage of the sum of total fatty acids. Statistical analysis results are reported.

|                 | RGP          |        |              |        |              |        |              |        |              |        | Statistical analysis    |                 |
|-----------------|--------------|--------|--------------|--------|--------------|--------|--------------|--------|--------------|--------|-------------------------|-----------------|
|                 | T0           |        | T15          |        | T35          |        | T55          |        | T75          |        | ANOVA + Tukey's test    |                 |
|                 | Mean         | St.dev | Significant differences | <i>p</i> -value |
| <b>SFA (%)</b>  | <b>20.43</b> | 0.30   | <b>20.14</b> | 0.07   | <b>19.91</b> | 0.08   | <b>20.00</b> | 0.18   | <b>20.09</b> | 0.10   |                         |                 |
| C14:0           | <b>0.09</b>  | 0.00   | <b>0.08</b>  | 0.00   | <b>0.08</b>  | 0.00   | <b>0.08</b>  | 0.00   | <b>0.08</b>  | 0.00   |                         |                 |
| C15:0           | <b>0.09</b>  | 0.00   | <b>0.09</b>  | 0.01   | <b>0.09</b>  | 0.00   | <b>0.09</b>  | 0.00   | <b>0.09</b>  | 0.00   |                         |                 |
| C16:0           | <b>18.59</b> | 0.28   | <b>18.30</b> | 0.12   | <b>18.00</b> | 0.10   | <b>18.11</b> | 0.20   | <b>18.20</b> | 0.09   |                         |                 |
| C17:0           | <b>0.08</b>  | 0.01   | <b>0.08</b>  | 0.01   | <b>0.08</b>  | 0.01   | <b>0.09</b>  | 0.01   | <b>0.09</b>  | 0.01   |                         |                 |
| C18:0           | <b>1.16</b>  | 0.01   | <b>1.18</b>  | 0.03   | <b>1.20</b>  | 0.01   | <b>1.19</b>  | 0.01   | <b>1.19</b>  | 0.02   |                         |                 |
| C20:0           | <b>0.11</b>  | 0.01   | <b>0.11</b>  | 0.00   | <b>0.12</b>  | 0.01   | <b>0.12</b>  | 0.01   | <b>0.12</b>  | 0.00   |                         |                 |
| C21:0           | <b>0.01</b>  | 0.01   | <b>0.02</b>  | 0.00   | <b>0.02</b>  | 0.00   | <b>0.02</b>  | 0.01   | <b>0.02</b>  | 0.00   |                         |                 |
| C22:0           | <b>0.14</b>  | 0.02   | <b>0.15</b>  | 0.02   | <b>0.16</b>  | 0.01   | <b>0.16</b>  | 0.01   | <b>0.16</b>  | 0.02   |                         |                 |
| C23:0           | <b>0.03</b>  | 0.00   | <b>0.04</b>  | 0.00   | <b>0.04</b>  | 0.00   | <b>0.04</b>  | 0.00   | <b>0.04</b>  | 0.00   |                         |                 |
| C24:0           | <b>0.09</b>  | 0.01   | <b>0.10</b>  | 0.01   | <b>0.12</b>  | 0.01   | <b>0.11</b>  | 0.01   | <b>0.10</b>  | 0.01   |                         |                 |
| <b>MUFA (%)</b> | <b>18.26</b> | 0.13   | <b>18.47</b> | 0.10   | <b>18.51</b> | 0.13   | <b>18.57</b> | 0.23   | <b>18.50</b> | 0.17   |                         |                 |
| C16:1 n9        | <b>0.04</b>  | 0.04   | <b>0.07</b>  | 0.00   | <b>0.07</b>  | 0.01   | <b>0.07</b>  | 0.00   | <b>0.07</b>  | 0.00   |                         |                 |
| C16:1 n7        | <b>0.17</b>  | 0.00   | <b>0.16</b>  | 0.00   | <b>0.16</b>  | 0.00   | <b>0.17</b>  | 0.00   | <b>0.17</b>  | 0.00   |                         |                 |
| C17:1 n8        | <b>0.04</b>  | 0.00   | <b>0.05</b>  | 0.00   | <b>0.05</b>  | 0.00   | <b>0.05</b>  | 0.01   | <b>0.05</b>  | 0.00   |                         |                 |
| C18:1 n9        | <b>15.97</b> | 0.16   | <b>16.12</b> | 0.09   | <b>16.09</b> | 0.15   | <b>16.17</b> | 0.23   | <b>16.11</b> | 0.16   |                         |                 |
| C18:1 n7        | <b>1.21</b>  | 0.04   | <b>1.20</b>  | 0.02   | <b>1.23</b>  | 0.02   | <b>1.23</b>  | 0.03   | <b>1.22</b>  | 0.02   |                         |                 |
| C18:1 n5        | <b>0.02</b>  | 0.01   | <b>0.00</b>  | 0.00   | <b>0.01</b>  | 0.01   | <b>0.00</b>  | 0.01   | <b>0.00</b>  | 0.00   |                         |                 |
| C20:1 n11       | <b>0.03</b>  | 0.00   |                         |                 |
| C20:1 n9        | <b>0.66</b>  | 0.02   | <b>0.69</b>  | 0.01   | <b>0.71</b>  | 0.01   | <b>0.71</b>  | 0.02   | <b>0.70</b>  | 0.01   |                         |                 |
| C22:1 n9        | <b>0.08</b>  | 0.01   | <b>0.09</b>  | 0.00   | <b>0.09</b>  | 0.01   | <b>0.09</b>  | 0.01   | <b>0.09</b>  | 0.00   |                         |                 |
| C24:1 n9        | <b>0.05</b>  | 0.01   | <b>0.06</b>  | 0.01   | <b>0.07</b>  | 0.01   | <b>0.07</b>  | 0.01   | <b>0.06</b>  | 0.00   |                         |                 |
| <b>PUFA (%)</b> | <b>60.56</b> | 0.33   | <b>60.58</b> | 0.08   | <b>60.70</b> | 0.20   | <b>60.58</b> | 0.34   | <b>60.56</b> | 0.27   |                         |                 |
| <b>n6</b>       | <b>56.02</b> | 0.28   | <b>56.00</b> | 0.14   | <b>56.15</b> | 0.21   | <b>56.01</b> | 0.31   | <b>56.02</b> | 0.30   |                         |                 |
| C18:2 n6        | <b>55.93</b> | 0.28   | <b>55.91</b> | 0.12   | <b>56.06</b> | 0.19   | <b>55.92</b> | 0.28   | <b>55.93</b> | 0.27   |                         |                 |
| C20:2 n6        | <b>0.09</b>  | 0.02   | <b>0.09</b>  | 0.02   | <b>0.08</b>  | 0.03   | <b>0.09</b>  | 0.03   | <b>0.09</b>  | 0.03   |                         |                 |

|                     |             |      |             |      |             |      |             |      |             |      |                                  |          |
|---------------------|-------------|------|-------------|------|-------------|------|-------------|------|-------------|------|----------------------------------|----------|
| <b>n3</b>           | <b>4.53</b> | 0.06 | <b>4.56</b> | 0.08 | <b>4.54</b> | 0.06 | <b>4.56</b> | 0.07 | <b>4.52</b> | 0.04 |                                  |          |
| C16:4 n3            | <b>0.06</b> | 0.03 | <b>0.06</b> | 0.03 | <b>0.03</b> | 0.01 | <b>0.03</b> | 0.01 | <b>0.04</b> | 0.01 |                                  |          |
| C18:3 n3            | <b>4.47</b> | 0.08 | <b>4.50</b> | 0.08 | <b>4.51</b> | 0.05 | <b>4.53</b> | 0.07 | <b>4.49</b> | 0.05 |                                  |          |
| <b>other n</b>      |             |      |             |      |             |      |             |      |             |      |                                  |          |
| C18:4 n1            | <b>0.02</b> | 0.03 | <b>0.02</b> | 0.03 | <b>0.02</b> | 0.03 | <b>0.02</b> | 0.03 | <b>0.01</b> | 0.02 |                                  |          |
| <b>other FA (%)</b> |             |      |             |      |             |      |             |      |             |      |                                  |          |
| C17:0 iso           | <b>0.04</b> | 0.04 | <b>0.00</b> | 0.00 | <b>0.00</b> | 0.00 | <b>0.00</b> | 0.00 | <b>0.00</b> | 0.00 |                                  |          |
| C18:2 n6 trans      | <b>0.04</b> | 0.00 | <b>0.04</b> | 0.01 | <b>0.04</b> | 0.01 | <b>0.04</b> | 0.01 | <b>0.04</b> | 0.01 |                                  |          |
| C19:1 n10 trans     | <b>0.06</b> | 0.01 | <b>0.06</b> | 0.00 | <b>0.07</b> | 0.01 | <b>0.06</b> | 0.01 | <b>0.06</b> | 0.01 |                                  |          |
| Unknown 1           | <b>0.07</b> | 0.02 | <b>0.09</b> | 0.02 | <b>0.11</b> | 0.01 | <b>0.10</b> | 0.01 | <b>0.09</b> | 0.01 |                                  |          |
| Unknown 2           | <b>0.46</b> | 0.02 | <b>0.50</b> | 0.02 | <b>0.52</b> | 0.00 | <b>0.51</b> | 0.01 | <b>0.51</b> | 0.01 | T15-T0; T35-T0; T55-T0; T75-T0   | 1.56E-03 |
| Unknown 3           | <b>0.12</b> | 0.01 | <b>0.12</b> | 0.01 | <b>0.14</b> | 0.00 | <b>0.13</b> | 0.01 | <b>0.15</b> | 0.00 | T35-T0; T75-T0; T35-T15; T75-T15 | 1.26E-03 |
| PUFA/SFA            | <b>2.97</b> | 0.06 | <b>3.01</b> | 0.01 | <b>3.05</b> | 0.02 | <b>3.03</b> | 0.04 | <b>3.01</b> | 0.03 |                                  |          |
| MUFA/SFA            | <b>0.89</b> | 0.01 | <b>0.92</b> | 0.01 | <b>0.93</b> | 0.00 | <b>0.93</b> | 0.01 | <b>0.92</b> | 0.00 | T15-T0; T35-T0; T55-T0; T75-T0   | 2.34E-03 |
| n3/n6               | <b>0.08</b> | 0.00 |                                  |          |

SFA = Saturated Fatty Acid

MUFA = Monounsaturated Fatty Acid

PUFA = Polyunsaturated Fatty Acid

**Table S7.** Complete fatty acid profile of Sourdough Pasta (SP) samples during storage at 5°C under modified atmosphere. Each fatty acid was expressed as percentage of the sum of total fatty acids. Statistical analysis results are reported.

|                 | SP           |        |              |        |              |        |              |        |              |        | Statistical analysis                      |                 |
|-----------------|--------------|--------|--------------|--------|--------------|--------|--------------|--------|--------------|--------|-------------------------------------------|-----------------|
|                 | T0           |        | T15          |        | T35          |        | T55          |        | T75          |        | ANOVA + Tukey's test                      |                 |
|                 | Mean         | St.dev | Significant differences                   | <i>p</i> -value |
| <b>SFA (%)</b>  | <b>20.11</b> | 0.05   | <b>20.27</b> | 0.18   | <b>19.96</b> | 0.08   | <b>19.87</b> | 0.11   | <b>19.82</b> | 0.03   | T75-T0; T35-T15; T55-T15; T75-T15         | 2.15E-03        |
| C14:0           | <b>0.08</b>  | 0.01   | <b>0.08</b>  | 0.00   | <b>0.08</b>  | 0.01   | <b>0.08</b>  | 0.00   | <b>0.08</b>  | 0.00   |                                           |                 |
| C15:0           | <b>0.09</b>  | 0.00   |                                           |                 |
| C16:0           | <b>18.22</b> | 0.09   | <b>18.42</b> | 0.23   | <b>18.03</b> | 0.10   | <b>17.91</b> | 0.11   | <b>17.89</b> | 0.03   | T35-T15; T55-T15; T75-T15                 | 2.49E-03        |
| C17:0           | <b>0.09</b>  | 0.00   | <b>0.09</b>  | 0.01   | <b>0.09</b>  | 0.00   | <b>0.09</b>  | 0.00   | <b>0.09</b>  | 0.01   |                                           |                 |
| C18:0           | <b>1.20</b>  | 0.02   | <b>1.19</b>  | 0.02   | <b>1.21</b>  | 0.01   | <b>1.22</b>  | 0.01   | <b>1.21</b>  | 0.02   |                                           |                 |
| C20:0           | <b>0.12</b>  | 0.01   | <b>0.12</b>  | 0.00   | <b>0.12</b>  | 0.00   | <b>0.13</b>  | 0.00   | <b>0.12</b>  | 0.00   |                                           |                 |
| C21:0           | <b>0.03</b>  | 0.00   | <b>0.02</b>  | 0.01   | <b>0.03</b>  | 0.00   | <b>0.02</b>  | 0.01   | <b>0.02</b>  | 0.01   |                                           |                 |
| C22:0           | <b>0.15</b>  | 0.01   | <b>0.14</b>  | 0.01   | <b>0.16</b>  | 0.01   | <b>0.17</b>  | 0.00   | <b>0.17</b>  | 0.00   | T55-T0; T35-T15; T55-T15; T75-T15         | 7.91E-04        |
| C23:0           | <b>0.04</b>  | 0.00   | <b>0.04</b>  | 0.00   | <b>0.04</b>  | 0.00   | <b>0.05</b>  | 0.00   | <b>0.04</b>  | 0.00   | T15-T0; T55-T15; T75-T15; T55-T35         | 1.45E-03        |
| C24:0           | <b>0.10</b>  | 0.01   | <b>0.09</b>  | 0.01   | <b>0.11</b>  | 0.00   | <b>0.12</b>  | 0.01   | <b>0.12</b>  | 0.01   | T55-T0; T75-T0; T35-T15; T55-T15; T75-T15 | 2.70E-04        |
| <b>MUFA (%)</b> | <b>18.55</b> | 0.19   | <b>18.52</b> | 0.18   | <b>18.72</b> | 0.21   | <b>18.78</b> | 0.16   | <b>18.82</b> | 0.11   |                                           |                 |
| C16:1 n9        | <b>0.07</b>  | 0.00   |                                           |                 |
| C16:1 n7        | <b>0.17</b>  | 0.00   | <b>0.17</b>  | 0.01   | <b>0.17</b>  | 0.01   | <b>0.17</b>  | 0.00   | <b>0.17</b>  | 0.01   |                                           |                 |
| C17:1 n8        | <b>0.05</b>  | 0.00   |                                           |                 |
| C18:1 n9        | <b>16.11</b> | 0.17   | <b>16.14</b> | 0.18   | <b>16.25</b> | 0.22   | <b>16.29</b> | 0.19   | <b>16.34</b> | 0.16   |                                           |                 |
| C18:1 n7        | <b>1.24</b>  | 0.04   | <b>1.23</b>  | 0.04   | <b>1.26</b>  | 0.06   | <b>1.25</b>  | 0.03   | <b>1.25</b>  | 0.06   |                                           |                 |
| C18:1 n5        | <b>0.02</b>  | 0.01   | <b>0.00</b>  | 0.01   | <b>0.00</b>  | 0.00   | <b>0.01</b>  | 0.00   | <b>0.00</b>  | 0.00   | T15-T0; T35-T0; T75-T0                    | 3.16E-03        |
| C20:1 n11       | <b>0.03</b>  | 0.00   | <b>0.03</b>  | 0.00   | <b>0.03</b>  | 0.00   | <b>0.03</b>  | 0.01   | <b>0.02</b>  | 0.02   |                                           |                 |
| C20:1 n9        | <b>0.71</b>  | 0.01   | <b>0.69</b>  | 0.02   | <b>0.74</b>  | 0.01   | <b>0.75</b>  | 0.01   | <b>0.75</b>  | 0.01   | T55-T0; T75-T0; T35-T15; T55-T15; T75-T15 | 7.76E-04        |
| C22:1 n9        | <b>0.09</b>  | 0.01   | <b>0.08</b>  | 0.01   | <b>0.09</b>  | 0.00   | <b>0.10</b>  | 0.00   | <b>0.09</b>  | 0.00   | T55-T0; T55-T15                           | 1.18E-02        |
| C24:1 n9        | <b>0.06</b>  | 0.01   | <b>0.05</b>  | 0.00   | <b>0.07</b>  | 0.00   | <b>0.07</b>  | 0.00   | <b>0.07</b>  | 0.01   | T35-T15; T55-T15; T75-T15                 | 3.25E-03        |
| <b>PUFA (%)</b> | <b>60.75</b> | 0.16   | <b>60.64</b> | 0.17   | <b>60.70</b> | 0.18   | <b>60.70</b> | 0.29   | <b>60.72</b> | 0.12   |                                           |                 |
| <b>n6</b>       | <b>56.16</b> | 0.14   | <b>56.10</b> | 0.14   | <b>56.15</b> | 0.21   | <b>56.14</b> | 0.27   | <b>56.16</b> | 0.07   |                                           |                 |
| C18:2 n6        | <b>56.04</b> | 0.14   | <b>56.00</b> | 0.14   | <b>56.03</b> | 0.20   | <b>56.03</b> | 0.26   | <b>56.04</b> | 0.07   |                                           |                 |

|                     |             |      |             |      |             |      |             |      |             |      |                                   |          |
|---------------------|-------------|------|-------------|------|-------------|------|-------------|------|-------------|------|-----------------------------------|----------|
| C20:2 n6            | <b>0.11</b> | 0.01 | <b>0.11</b> | 0.00 | <b>0.11</b> | 0.01 | <b>0.11</b> | 0.00 | <b>0.11</b> | 0.00 |                                   |          |
| <b>n3</b>           | <b>4.59</b> | 0.04 | <b>4.54</b> | 0.03 | <b>4.55</b> | 0.03 | <b>4.56</b> | 0.03 | <b>4.56</b> | 0.06 |                                   |          |
| C16:4 n3            | <b>0.04</b> | 0.03 | <b>0.03</b> | 0.00 | <b>0.04</b> | 0.01 | <b>0.02</b> | 0.01 | <b>0.02</b> | 0.02 |                                   |          |
| C18:3 n3            | <b>4.55</b> | 0.01 | <b>4.51</b> | 0.03 | <b>4.51</b> | 0.03 | <b>4.54</b> | 0.02 | <b>4.54</b> | 0.04 |                                   |          |
| <b>other FA (%)</b> |             |      |             |      |             |      |             |      |             |      |                                   |          |
| C18:2 n6 trans      | <b>0.04</b> | 0.01 | <b>0.04</b> | 0.00 | <b>0.04</b> | 0.00 | <b>0.04</b> | 0.01 | <b>0.04</b> | 0.01 |                                   |          |
| C19:1 n10 trans     | <b>0.06</b> | 0.00 | <b>0.07</b> | 0.00 | <b>0.06</b> | 0.00 | <b>0.06</b> | 0.00 | <b>0.07</b> | 0.01 |                                   |          |
| Unknown 1           | <b>0.09</b> | 0.01 | <b>0.08</b> | 0.01 | <b>0.11</b> | 0.00 | <b>0.12</b> | 0.01 | <b>0.11</b> | 0.01 | T55-T0; T35-T15; T55-T15; T75-T15 | 2.76E-03 |
| Unknown 2           | <b>0.30</b> | 0.04 | <b>0.29</b> | 0.04 | <b>0.31</b> | 0.04 | <b>0.32</b> | 0.03 | <b>0.32</b> | 0.04 |                                   |          |
| Unknown 3           | <b>0.10</b> | 0.01 | <b>0.10</b> | 0.02 | <b>0.10</b> | 0.01 | <b>0.10</b> | 0.01 | <b>0.11</b> | 0.01 |                                   |          |
| PUFA/SFA            | <b>3.02</b> | 0.00 | <b>2.99</b> | 0.03 | <b>3.04</b> | 0.01 | <b>3.05</b> | 0.03 | <b>3.06</b> | 0.01 | T55-T15; T75-T15                  | 6.51E-03 |
| MUFA/SFA            | <b>0.92</b> | 0.01 | <b>0.91</b> | 0.02 | <b>0.94</b> | 0.01 | <b>0.95</b> | 0.00 | <b>0.95</b> | 0.01 | T55-T15; T75-T15                  | 1.21E-02 |
| n3/n6               | <b>0.08</b> | 0.00 |                                   |          |

SFA = Saturated Fatty Acid

MUFA = Monounsaturated Fatty Acid

PUFA = Polyunsaturated Fatty Aci
